# Supplementary material for: High-performance water desalination of heteroatom nitrogen- and sulfur-codoped open hollow tubular porous carbon electrodes via capacitive deionization
Source: Royal Society of Chemistry journal article supplement (doi:10.1039/c9en00794f), 2019-01-01
Supplement: c9en00794f1.pdf [file c9en00794f1.pdf]

*Electronic Supplementary Information*

**High-Performance Water Desalination of Nitrogen- and  
Sulfur- Codoped Open Hollow Tubular Porous Carbon  
Electrodes via Capacitive Deionization**

Qing Zhang <sup>a</sup>, Lingling Hu <sup>a</sup>, Dehua Xia <sup>a, b\*</sup>, Yajing Huang <sup>a</sup>, Ping Li <sup>a, b</sup>, Li Tan <sup>a</sup>,  
Yongyi Wang <sup>a</sup>, Chun He <sup>a, b\*</sup>, Dong Shu <sup>c</sup>, Xi Xie <sup>d</sup>

<sup>a</sup> *School of Environmental Science and Engineering, Sun Yat-sen University,  
Guangzhou, 510275, China*

<sup>b</sup> *Guangdong Provincial Key Laboratory of Environmental Pollution Control and  
Remediation Technology, Guangzhou, 510275, China*

<sup>c</sup> *Key Lab of Technology on Electrochemical Energy Storage and Power Generation  
in Guangdong Universities, School of Chemistry and Environment, South China  
Normal University, Guangzhou, 510006, China*

<sup>d</sup> *State Key Laboratory of Optoelectronic Materials and Technologies, Sun Yat-Sen  
University, Guangzhou, 510275, China*

**(13 Pages including supplementary 2 Texts and 9 Figures)**

---

\* Corresponding author: School of Environmental Science and Engineering, Sun Yat-sen University, Guangzhou, 510275, China. Tel.: +86 20 39332690. Email address: xiadehua3@mail.sysu.edu.cn (D.H. Xia); [hechun@mail.sysu.edu.cn](mailto:hechun@mail.sysu.edu.cn) (C. He).

**Text S1.** Details on dispersion of MnO<sub>2</sub> nanorods in Experiment processes.

**Text S2.** Morphology and electrochemical performance of CAC.

**Fig. S1** Schematic of capacitive deionization experimental configuration in this work.

**Fig. S2** Standard curve of conductivity variation vs. concentration of NaCl solution.

**Fig. S3** (a) Digital pictures of hydrogels to synthesize N, S-HTPC (left) and N, S-PC (right); (b) Digital pictures of the dispersed state of MnO<sub>2</sub> nanorods in DI water (left side),  $\beta$ -CD solution (middle) and LB agar@ $\beta$ -CD hydrogel (right side)

**Fig. S4** SEM image of HTPC.

**Fig. S5** Cyclic voltammograms curves of N, S-HTPC (a), HTPC (b) and N, S-PC (c) electrodes at different scan rates.

**Fig. S6** Galvanostatic charge-discharge curves of N, S-HTPC (a), HTPC (b) and N, S-PC (c) electrodes at different current density.

**Fig. S7** iR drops of N, S-HTPC, HTPC and N, S-PC electrodes at different current densities.

**Fig. S8** SEM image (a), nitrogen adsorption/desorption isotherms (b), pore size distributions (c), cyclic voltammetry curves at 50 mV s<sup>-1</sup> (d), electrochemical impedance spectra (e) and galvanostatic charge-discharge curves at 0.2 A g<sup>-1</sup> (f) of CAC sample. (Electrolyte: 1.0 M NaCl aqueous solution)

**Fig. S9** CDI profiles of electrosorption capacity variation vs. time (a) and Ragone plots (b) in different initial concentrations of NaCl solution at 1.2 V.

**Text S1.** Details on dispersion of MnO<sub>2</sub> nanorods in Experiment processes.

The detailed experiment process was as follows: (1) 0.15 g MnO<sub>2</sub> were dispersed in 30 mL DI water by sonication, then placed for 2 h. (left side in **Fig. S3b**) (2) 0.15 g MnO<sub>2</sub> were dispersed in 30 mL  $\beta$ -CD solution by sonication, then placed for 2 h. (middle in **Fig. S3b**) (3) 0.15 g MnO<sub>2</sub> were dispersed in 30 mL mixed solution of  $\beta$ -CD and LB agar by sonication, then placed for 2 h. (right side in **Fig. S3b**) As expected, MnO<sub>2</sub> nanorods easily settled at the bottom of flask due to the gravity, whereas MnO<sub>2</sub> nanorods dispersed well because  $\beta$ -CD functioned as a special surfactant which could make a better dispersed state of MnO<sub>2</sub> nanorods in the presence of  $\beta$ -CD. Furthermore, after the addition of LB agar, LB agar with multitudinous -OH could strongly interact with  $\beta$ -CD to form hydrogel to stabilize the dispersed state of MnO<sub>2</sub> nanorods.”

## **Text S2.** Morphology and electrochemical performance of CAC

As shown in **Fig S8a**, the SEM image displayed the rough morphology without open channels of CAC. **Fig. S8b-c** showed that CAC exhibited a high specific surface of  $1411 \text{ m}^2 \text{ g}^{-1}$ , close to that of N, S-HTPC, and the pore structure was dominated by micropores. The lack of meso/macropores leads to the insufficient utilization of surface area derived from abundant micropores and the hindrance to ion diffusion, thus resulting in poor capacitive and electrosorption capacities.<sup>1,2</sup> The inferior electrochemical performance of CAC presented by CV, GCD and EIS measurements shown in **Fig. S8d-f** indicated the poor capacitive property due to the lack of meso/macropores structure.”

## **References**

1. C. L. Yeh, H. C. Hsi, K. C. Li and C. H. Hou, Improved performance in capacitive deionization of activated carbon electrodes with a tunable mesopore and micropore ratio, *Desalination*, 2015, **367**, 60-68.
2. T. Alencherry, A. R. Naveen, S. Ghosh, J. Daniel and R. Venkataraghavan, Effect of increasing electrical conductivity and hydrophilicity on the electrosorption capacity of activated carbon electrodes for capacitive deionization, *Desalination*, 2017, **415**, 14-19.

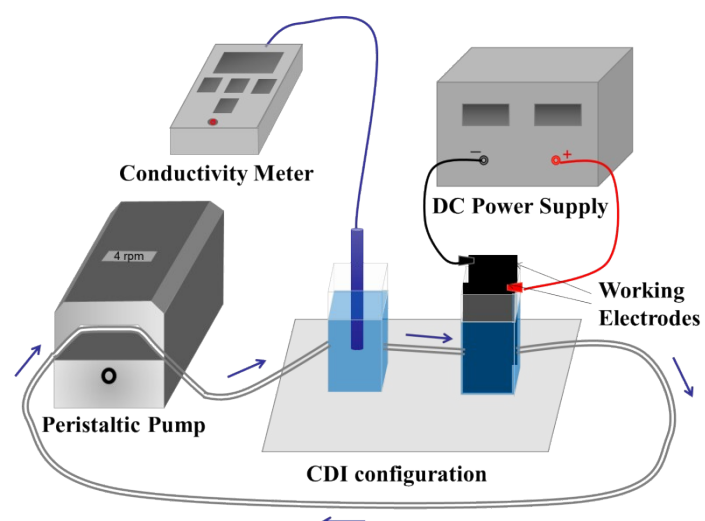

**Fig. S1** Schematic of capacitive deionization experimental configuration in this work.

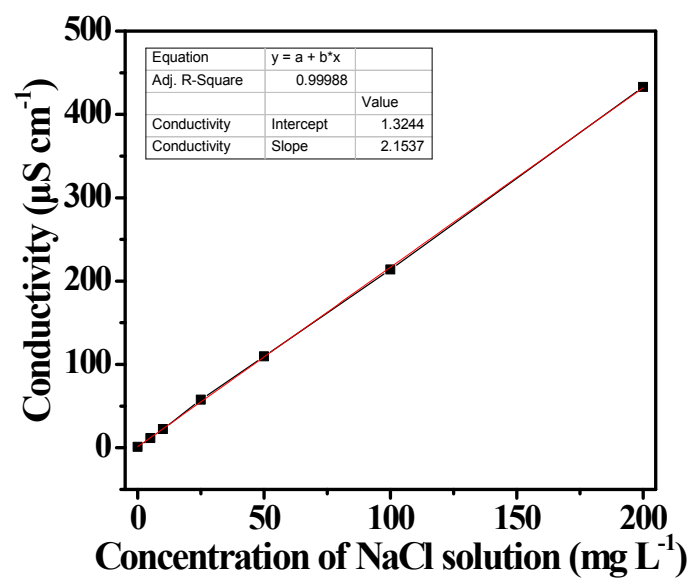

**Fig. S2** Standard curve of conductivity variation vs. concentration of NaCl solution.

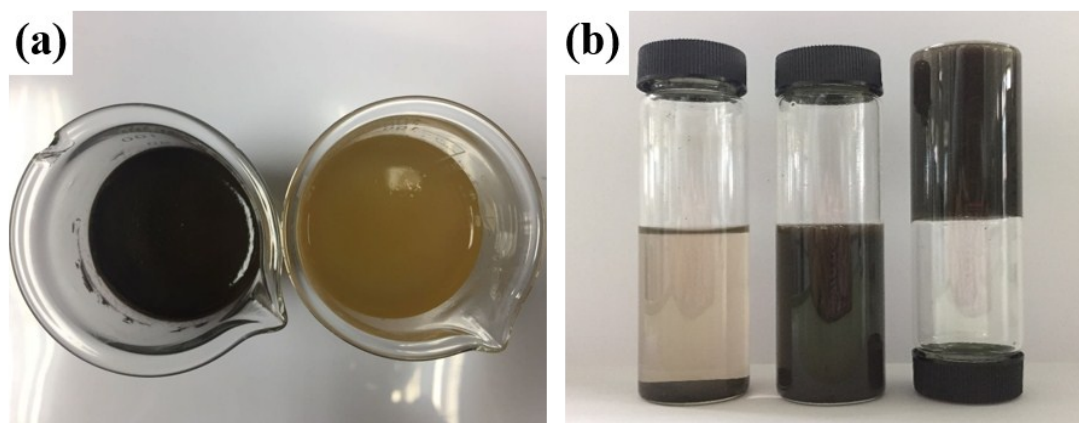

**Fig. S3** (a) Digital pictures of hydrogels to synthesize N, S-HTPC (left) and N, S-PC (right); (b) Digital pictures of the dispersed state of MnO<sub>2</sub> nanorods in DI water (left side), β-CD solution (middle) and LB agar@β-CD hydrogel (right side)

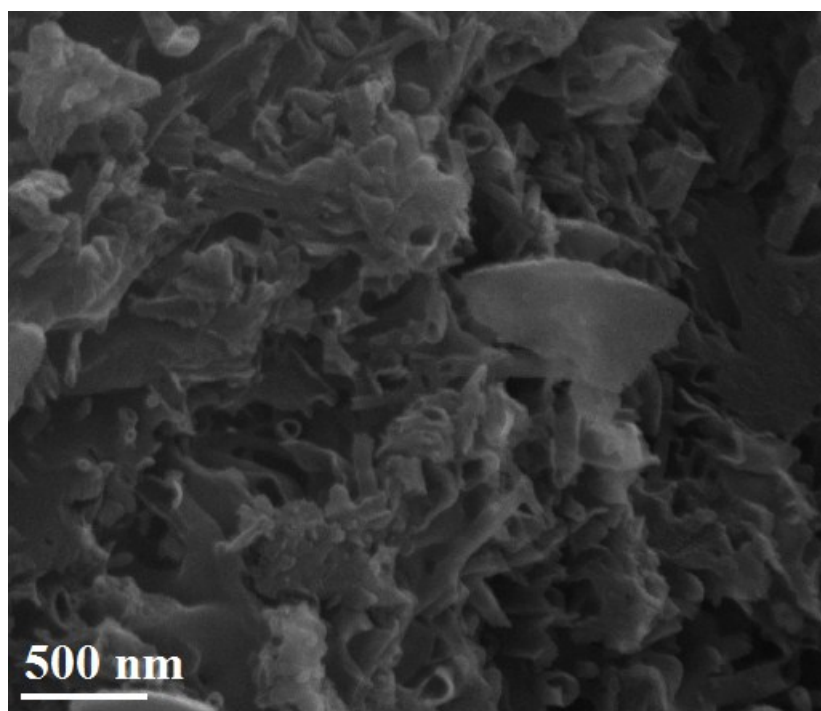

**Fig. S4** SEM image of HTPC.



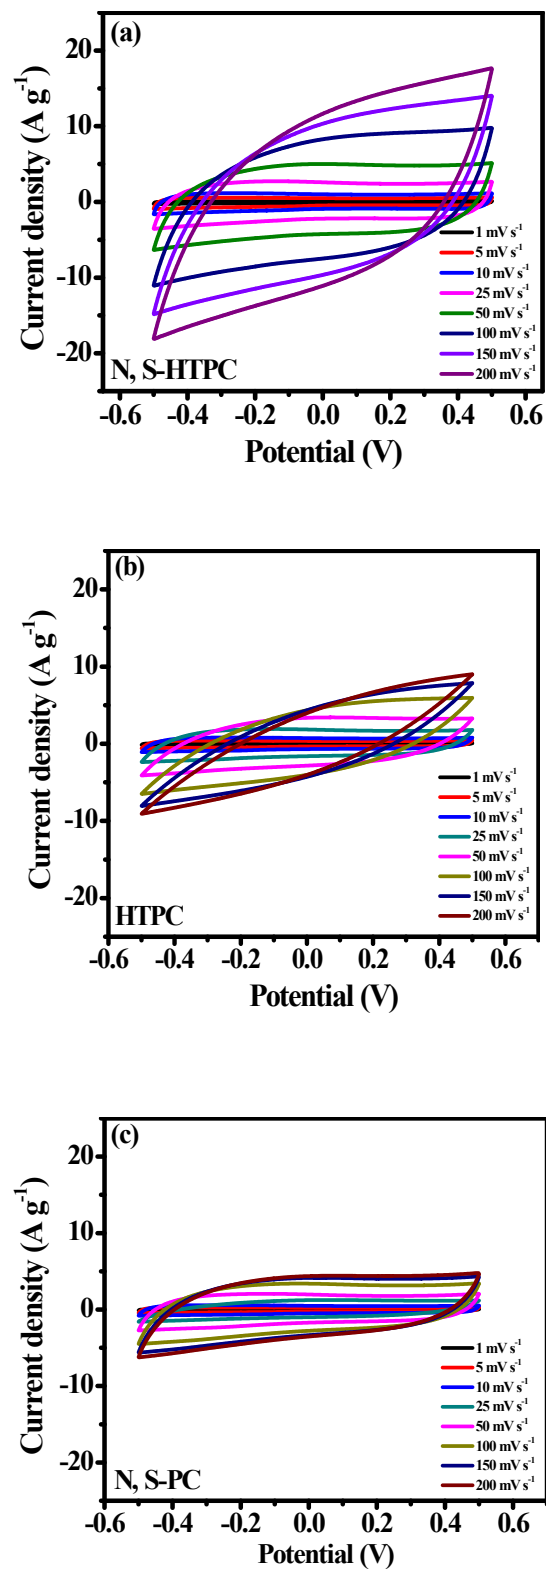

**Fig. S5** Cyclic voltammograms curves of N, S-HTPC (a), HTPC (b) and N, S-PC (c) electrodes at different scan rates.

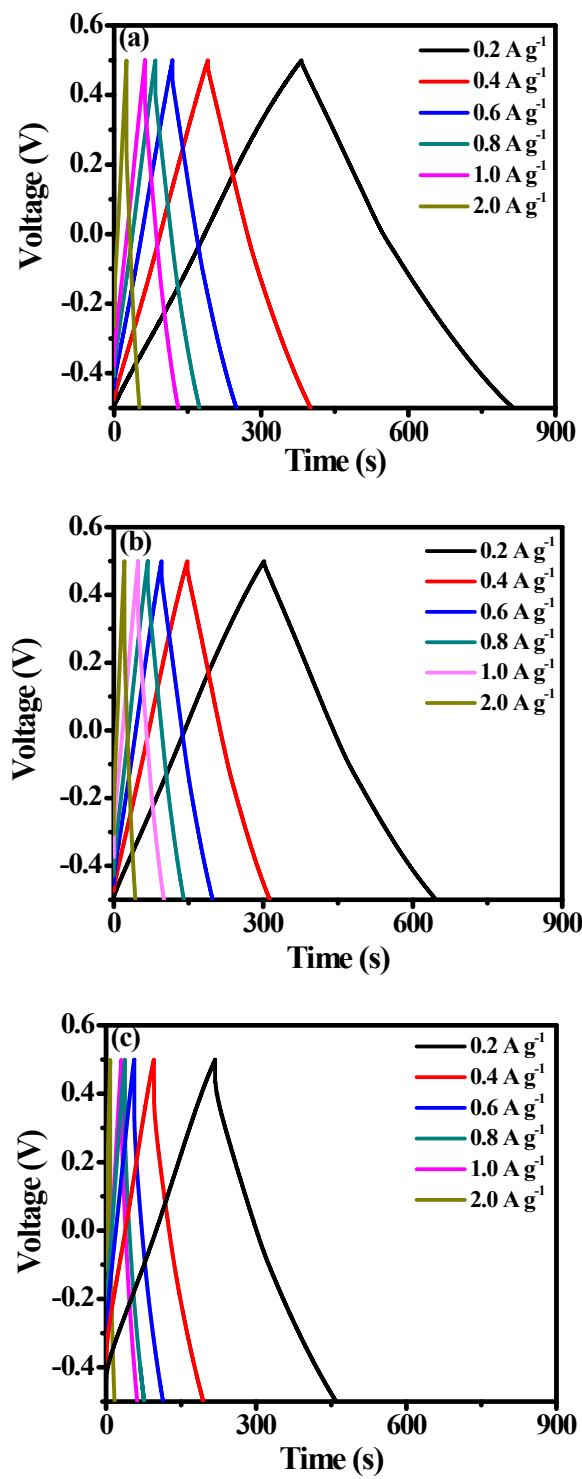

**Fig. S6** Galvanostatic charge-discharge curves of N, S-HTPC (a), HTPC (b) and N, S-PC (c) electrodes at different current densities.

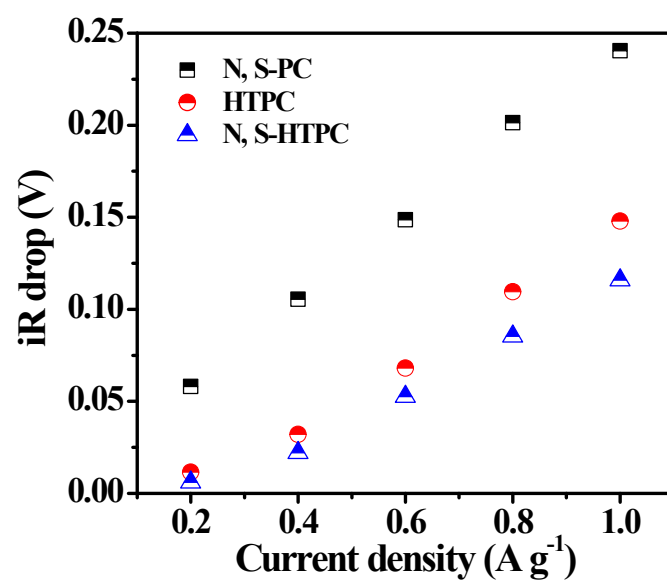

**Fig. S7** iR drops of N, S-HTPC, HTPC and N, S-PC electrodes at different current density.

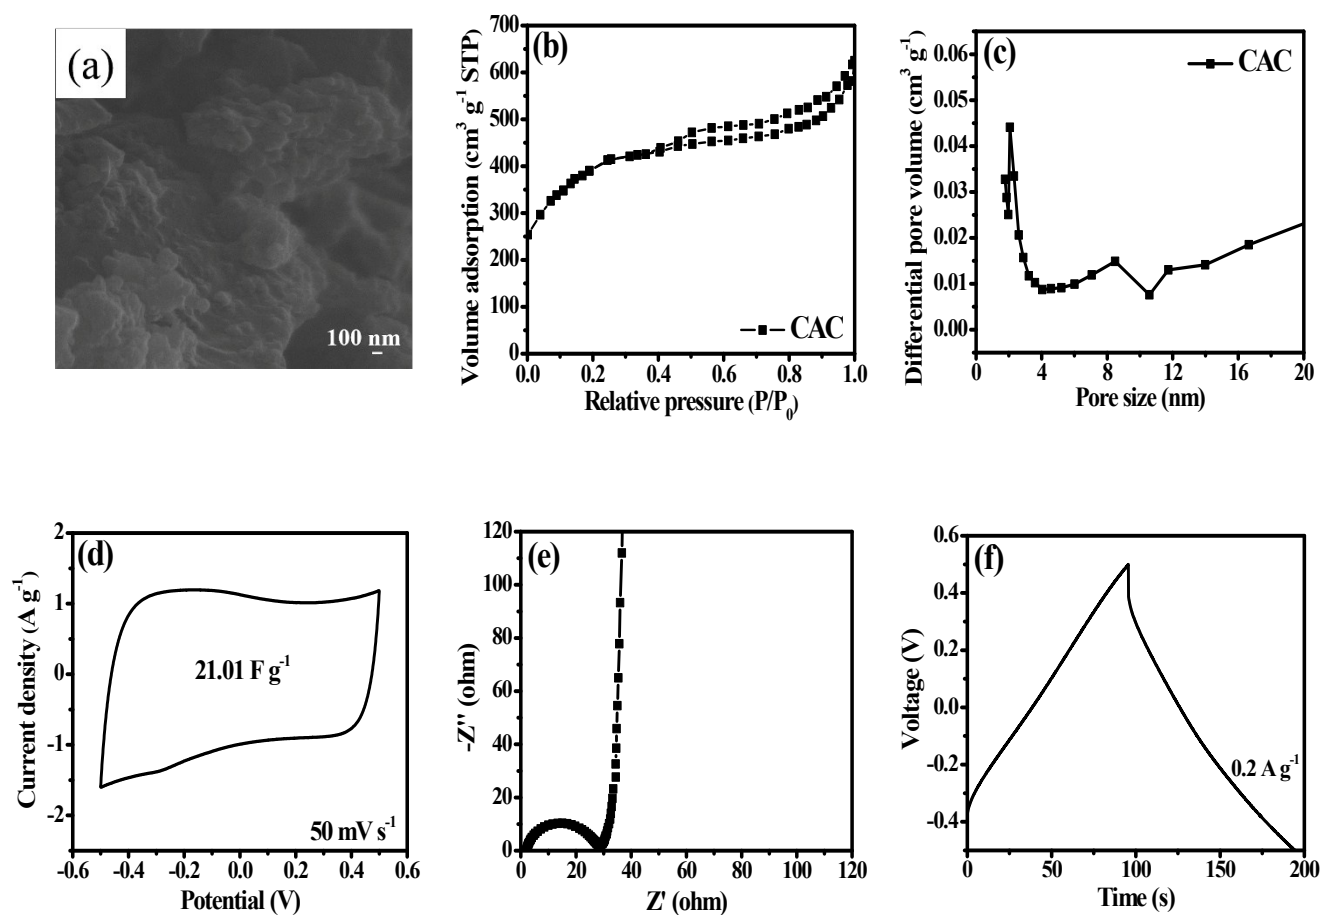

**Fig. S8** SEM image (a), nitrogen adsorption/desorption isotherms (b), pore size distributions (c), cyclic voltammetry curves at  $50 \text{ mV s}^{-1}$  (d), electrochemical impedance spectra (e) and galvanostatic charge-discharge curves at  $0.2 \text{ A g}^{-1}$  (f) of CAC sample. (Electrolyte:  $1.0 \text{ M NaCl}$  aqueous solution)

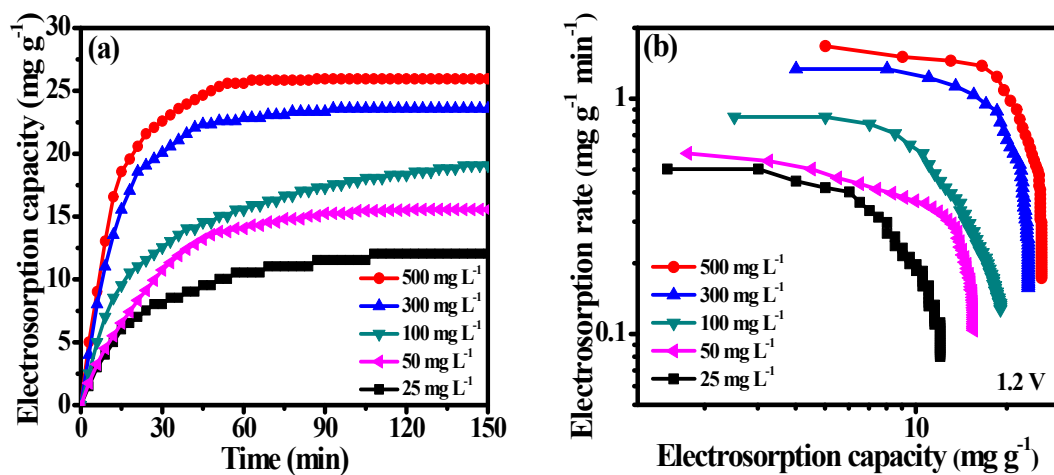

**Fig. S9** CDI profiles of electrosorption capacity variation vs. time (a) and Ragone plots (b) in different initial concentrations of NaCl solution at 1.2 V.
